# Supplementary material for: Hepcidin deficiency and iron deficiency do not alter tuberculosis susceptibility in a murine M.tb infection model
Source: PubMed Central journal article supplement (PMC5764373; doi:10.1371/journal.pone.0191038), 2018-01-11
Supplement: pone.0191038.s002.pdf [file pone.0191038.s002.pdf]

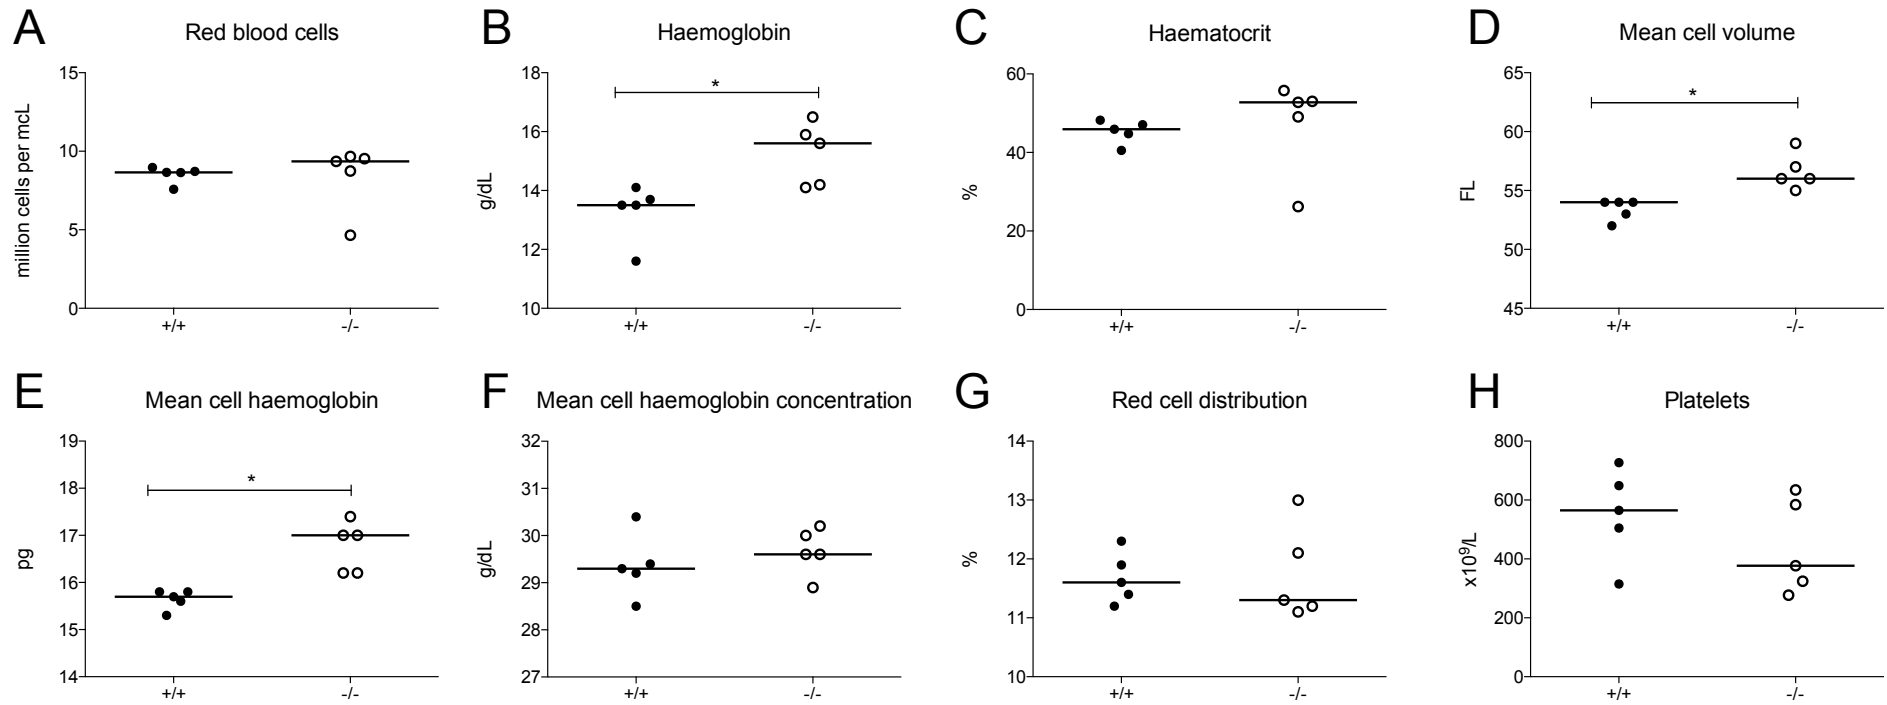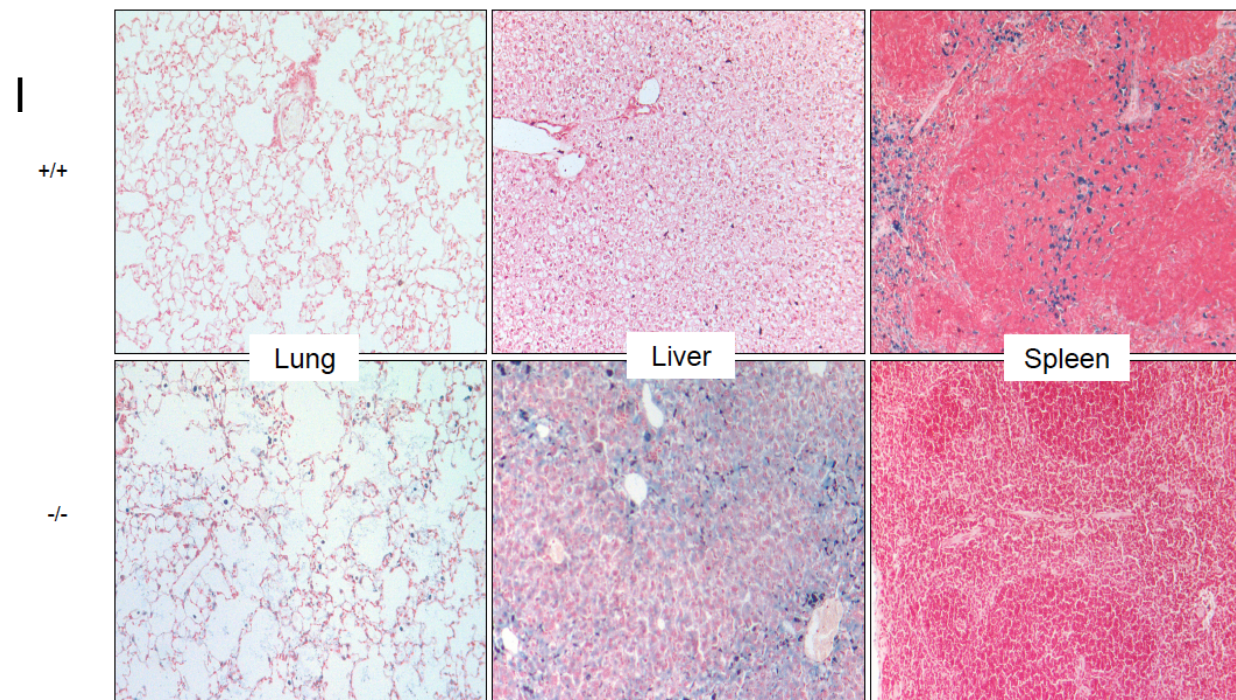

S2 Figure
